# Supplementary material for: The Influence of Brief Outing and Temporary Fostering Programs on Shelter Dog Welfare
Source: MDPI journal article supplement (doi:10.3390/ani13223528), 2023-11-15
Supplement: s1 [file s1]

**Table S1.** Relative risk (RR) ratios and 95% lower and upper confidence limits (LCL & UCL) for dogs that experienced a brief outing or temporary fostering stay on shelter outcomes

| Covariates                           | Shelter Outcomes              |      |      |                             |      |      |                                                     |      |      |
|--------------------------------------|-------------------------------|------|------|-----------------------------|------|------|-----------------------------------------------------|------|------|
|                                      | Remain in Care<br>vs. Adopted |      |      | Transfer Out<br>vs. Adopted |      |      | Euthanized, Lost,<br>or Died in Care<br>vs. Adopted |      |      |
|                                      | RR                            | LCL  | UCL  | RR                          | LCL  | UCL  | RR                                                  | LCL  | UCL  |
| (Intercept)                          | 0.05                          | 0.03 | 0.06 | 0.23                        | 0.18 | 0.28 | 0.06                                                | 0.05 | 0.08 |
| Temporary Fostering Stay vs. Control | 2.30                          | 1.72 | 3.08 | 0.24                        | 0.15 | 0.40 | 0.07                                                | 0.02 | 0.21 |
| Female vs Male Dogs                  | 0.89                          | 0.73 | 1.09 | 0.94                        | 0.81 | 1.09 | 0.70                                                | 0.58 | 0.83 |
| Dog Weight (kg)                      | 1.04                          | 1.03 | 1.05 | 0.98                        | 0.97 | 0.99 | 1.04                                                | 1.03 | 1.05 |
| Dog Age (months)                     | 1.00                          | 1.00 | 1.01 | 1.01                        | 1.01 | 1.01 | 1.01                                                | 1.01 | 1.01 |
| Stray vs. Owner Surrender            | 1.16                          | 0.92 | 1.46 | 1.55                        | 1.32 | 1.82 | 1.52                                                | 1.25 | 1.85 |
| Cruelty/Neglect vs. Owner Surrender  | 5.88                          | 3.87 | 8.94 | 2.42                        | 1.62 | 3.59 | 4.20                                                | 2.77 | 6.36 |
| Transfer In vs. Owner Surrender      | 0.49                          | 0.36 | 0.67 | 0.11                        | 0.07 | 0.17 | 0.20                                                | 0.13 | 0.30 |
|                                      |                               |      |      |                             |      |      |                                                     |      |      |
| (Intercept)                          | 0.07                          | 0.05 | 0.08 | 0.23                        | 0.19 | 0.28 | 0.03                                                | 0.02 | 0.04 |
| Brief Outing vs Control              | 1.97                          | 1.70 | 2.26 | 0.53                        | 0.44 | 0.65 | 0.20                                                | 0.14 | 0.28 |
| Female vs Male Dogs                  | 0.91                          | 0.81 | 1.03 | 1.01                        | 0.91 | 1.13 | 0.79                                                | 0.68 | 0.92 |
| Dog Weight (kg)                      | 1.05                          | 1.04 | 1.06 | 1.00                        | 0.99 | 1.00 | 1.06                                                | 1.06 | 1.07 |
| Dog Age (months)                     | 1.01                          | 1.00 | 1.01 | 1.01                        | 1.01 | 1.01 | 1.01                                                | 1.01 | 1.01 |
| Stray vs. Owner Surrender            | 1.49                          | 1.30 | 1.71 | 1.58                        | 1.40 | 1.79 | 2.29                                                | 1.92 | 2.72 |
| Cruelty/Neglect vs. Owner Surrender  | 1.28                          | 0.94 | 1.72 | 1.45                        | 1.13 | 1.87 | 2.41                                                | 1.77 | 3.28 |
| Transfer In vs. Owner Surrender      | 0.44                          | 0.36 | 0.53 | 0.10                        | 0.07 | 0.13 | 0.23                                                | 0.16 | 0.32 |

**Table S2.** Duration of brief outings and temporary fostering stays

| <b>Fixed Effect (Brief Outing Model)</b> | <b>Est</b> | <b>SE</b> | <b>df</b> | <b>t</b> | <b>p</b> |
|------------------------------------------|------------|-----------|-----------|----------|----------|
| (Intercept)                              | 2.98       | 0.15      | 199.26    | 19.38    | < .001   |
| Female vs. Male                          | 0.03       | 0.05      | 2203.48   | 0.66     | 0.508    |
| Dog Weight (kg)                          | -0.01      | 0.003     | 2202.88   | -2.04    | 0.042    |
| Dog Age (months)                         | 0.001      | 0.001     | 2209.02   | 1.02     | 0.309    |
| Stray vs. Owner Surrender                | 0.03       | 0.06      | 2221.65   | 0.52     | 0.602    |
| Cruelty/Neglect vs. Owner Surrender      | -0.13      | 0.24      | 2220.04   | -0.55    | 0.586    |
| Return vs. Owner Surrender               | 0.01       | 0.10      | 2210.68   | 0.13     | 0.900    |
| Transfer In vs. Owner Surrender          | 0.07       | 0.08      | 2141.07   | 0.89     | 0.391    |
| Staff vs. Community Member               | -0.09      | 0.12      | 1866.21   | -0.72    | 0.471    |
| Volunteer vs. Community Member           | 0.22       | 0.08      | 1625.53   | 2.73     | 0.006    |
| Dog Bite to a Person                     | -1.09      | 0.78      | 2193.22   | -1.39    | 0.165    |
| Dog Bite to Another Dog                  | -0.04      | 1.10      | 2189.84   | -0.03    | 0.974    |
| Caregiver Age (years)                    | -0.001     | 0.002     | 2219.29   | -0.52    | 0.601    |

| <b>Random Effect</b> |             |                 |           |
|----------------------|-------------|-----------------|-----------|
| <i>Groups</i>        | <i>Name</i> | <i>Variance</i> | <i>SD</i> |
| Shelter ID           | (Intercept) | 0.32            | 0.57      |
| Residual             |             | 1.19            | 1.09      |

| <b>Fixed Effect (Temporary Fostering Model)</b> | <b>Est</b> | <b>SE</b> | <b>df</b> | <b>t</b> | <b>p</b> |
|-------------------------------------------------|------------|-----------|-----------|----------|----------|
| (Intercept)                                     | 40.70      | 3.03      | 49.25     | 13.44    | < .001   |
| Female vs. Male                                 | -1.07      | 0.79      | 399.49    | -1.36    | 0.176    |
| Dog Weight (kg)                                 | -0.01      | 0.05      | 401.16    | -0.30    | 0.767    |
| Dog Age (months)                                | -0.01      | 0.01      | 400.09    | -0.46    | 0.648    |
| Stray vs. Owner Surrender                       | 0.69       | 1.24      | 402.52    | 0.56     | 0.578    |
| Cruelty/Neglect vs. Owner Surrender             | 5.20       | 5.61      | 396.91    | 0.93     | 0.355    |
| Return vs. Owner Surrender                      | 1.40       | 1.32      | 399.89    | 1.07     | 0.860    |
| Transfer In vs. Owner Surrender                 | 0.37       | 1.17      | 403.07    | 0.31     | 0.755    |
| Number of Resident Dogs                         | -0.30      | 0.51      | 401.25    | -0.58    | 0.560    |
| Caregiver previously provided outing            | 0.70       | 1.04      | 400.78    | 0.67     | 0.504    |
| Caregiver previously provided fostering stay    | 0.10       | 1.001     | 401.20    | 0.10     | 0.923    |
| Staff vs. Community Member                      | -2.52      | 1.55      | 406.73    | -1.62    | 0.105    |
| Volunteer vs. Community Member                  | 0.62       | 1.22      | 412.59    | 0.51     | 0.611    |
| Dog Bite to a Person                            | -13.96     | 4.56      | 397.38    | -3.06    | 0.002    |
| Caregiver Age (years)                           | 0.03       | 0.03      | 398.64    | 1.15     | 0.249    |

| <b>Random Effect</b> |             |                 |           |
|----------------------|-------------|-----------------|-----------|
| <i>Groups</i>        | <i>Name</i> | <i>Variance</i> | <i>SD</i> |
| Shelter ID           | (Intercept) | 99.52           | 9.98      |
| Residual             |             | 56.54           | 7.52      |

**Table S3.** Post-intervention length of stay for dogs that experienced a brief outing or temporary fostering stay

| <b>Fixed Effect (Brief Outing Model)</b> | <b>Est</b> | <b>SE</b> | <b>df</b> | <b>t</b> | <b>p</b> |
|------------------------------------------|------------|-----------|-----------|----------|----------|
| (Intercept)                              | 1.37       | 0.14      | 285.11    | 9.52     | < .001   |
| Female vs. Male Dogs                     | 0.06       | 0.07      | 829.12    | 0.82     | 0.412    |
| Dog Weight (kg)                          | 0.01       | 0.004     | 834.23    | 3.43     | 0.001    |
| Dog Age (months)                         | 0.001      | 0.001     | 831.97    | 1.33     | 0.183    |
| Stray vs. Owner Surrender                | 0.05       | 0.09      | 837.41    | 0.61     | 0.544    |
| Cruelty/Neglect vs. Owner Surrender      | 0.15       | 0.32      | 832.62    | 0.46     | 0.643    |
| Transfer In vs. Owner Surrender          | 0.03       | 0.10      | 819.11    | 0.35     | 0.730    |

| <b>Random Effect</b> |             |                 |           |
|----------------------|-------------|-----------------|-----------|
| <i>Groups</i>        | <i>Name</i> | <i>Variance</i> | <i>SD</i> |
| Shelter ID           | (Intercept) | 0.21            | 0.46      |
| Residual             |             | 0.90            | 0.95      |

| <b>Fixed Effect (Temporary Fostering Model)</b> | <b>Est</b> | <b>SE</b> | <b>df</b> | <b>t</b> | <b>p</b> |
|-------------------------------------------------|------------|-----------|-----------|----------|----------|
| (Intercept)                                     | 0.88       | 0.27      | 143.92    | 3.21     | 0.002    |
| Female vs. Male Dogs                            | 0.001      | 0.13      | 216.91    | 0.01     | 0.996    |
| Dog Weight (kg)                                 | 0.03       | 0.01      | 220.79    | 3.62     | < .001   |
| Dog Age (months)                                | 0.01       | 0.002     | 215.64    | 3.82     | < .001   |
| Stray vs. Owner Surrender                       | -0.02      | 0.21      | 221.89    | -0.08    | 0.934    |
| Transfer In vs. Owner Surrender                 | -0.14      | 0.17      | 221.89    | -0.85    | 0.397    |
| Number of Resident Dogs                         | 0.08       | 0.08      | 221.34    | 0.92     | 0.358    |

| <b>Random Effect</b> |             |                 |           |
|----------------------|-------------|-----------------|-----------|
| <i>Groups</i>        | <i>Name</i> | <i>Variance</i> | <i>SD</i> |
| Shelter ID           | (Intercept) | 0.22            | 0.47      |
| Residual             |             | 0.92            | 0.96      |
